## CORRECTION

# Correction: A multi-method characterization of Elasmobranch & Cheloniidae communities of the north-eastern Red Sea and Gulf of Aqaba

The *PLOS ONE* Staff

The affiliation for the fifth and eighth author is incorrect. The correct affiliation is not indicated. Ameer Abdulla and Paul A. Marshall are both not affiliated with #4 but with: NEOM, Department of Nature Conservation, Tabuk, Kingdom of Saudi Arabia.

The publisher apologizes for the error.

## Reference

1. Garzon F, Williams CT, Cochran JEM, Tanabe LK, Abdulla A, Berumen ML, et al. (2022) A multi-method characterization of Elasmobranch & Cheloniidae communities of the north-eastern Red Sea and Gulf of Aqaba. *PLOS ONE* 17(9): e0275511. <https://doi.org/10.1371/journal.pone.0275511> PMID: 36178940

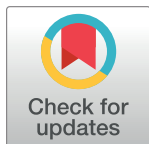

## OPEN ACCESS

**Citation:** The *PLOS ONE* Staff (2024) Correction: A multi-method characterization of Elasmobranch & Cheloniidae communities of the north-eastern Red Sea and Gulf of Aqaba. *PLoS ONE* 19(12): e0315200. <https://doi.org/10.1371/journal.pone.0315200>

**Published:** December 4, 2024

**Copyright:** © 2024 The PLOS ONE Staff. This is an open access article distributed under the terms of the [Creative Commons Attribution License](https://creativecommons.org/licenses/by/4.0/), which permits unrestricted use, distribution, and reproduction in any medium, provided the original author and source are credited.
